# Supplementary material for: The genetic structure of a Venturia inaequalis population in a heterogeneous host population composed of different Malus species
Source: PubMed Central journal article supplement (PMC3626921; doi:10.1186/1471-2148-13-64), 2013-03-12

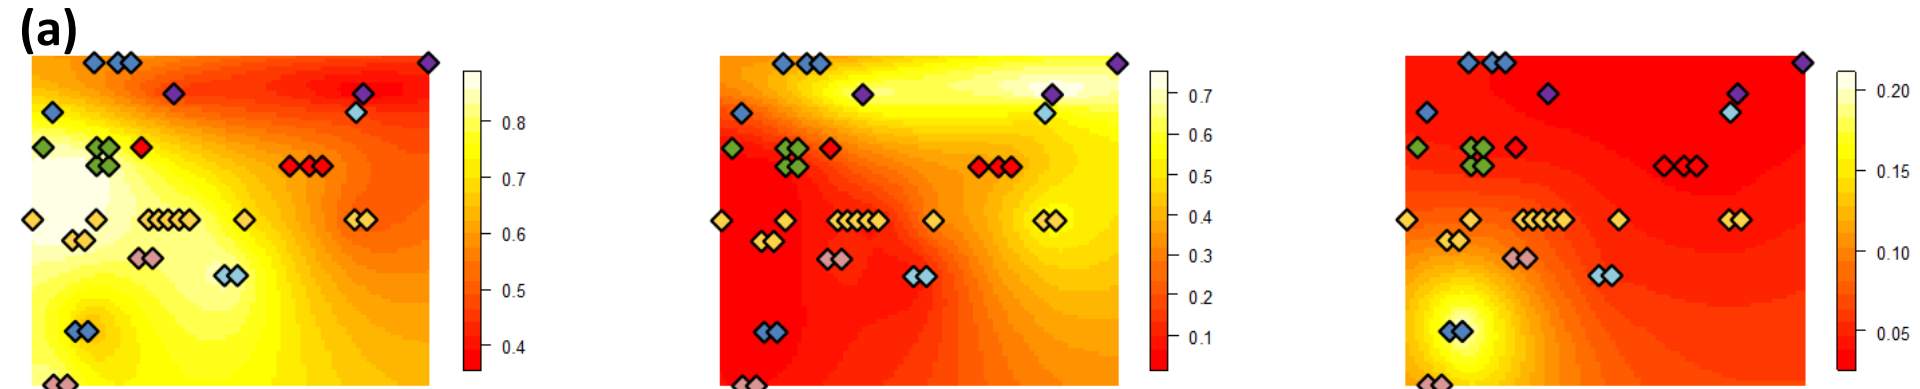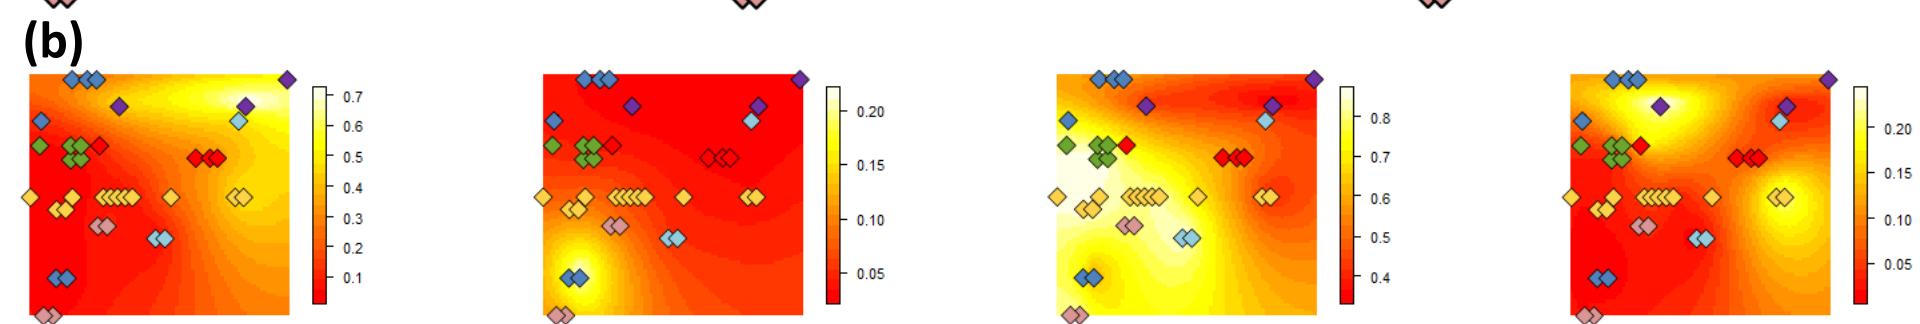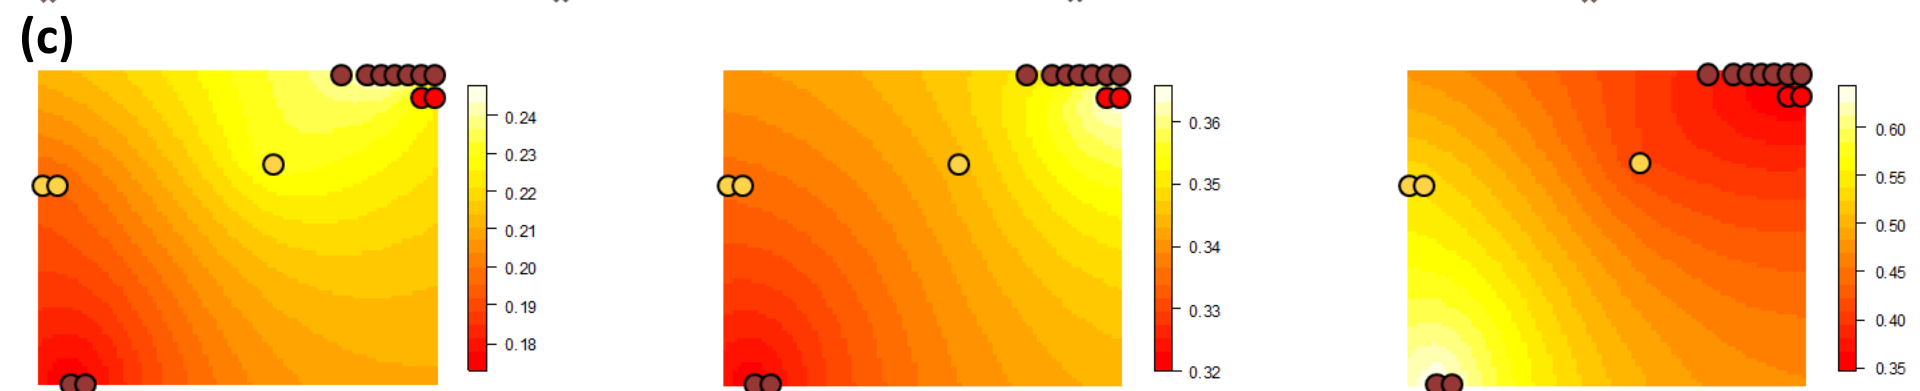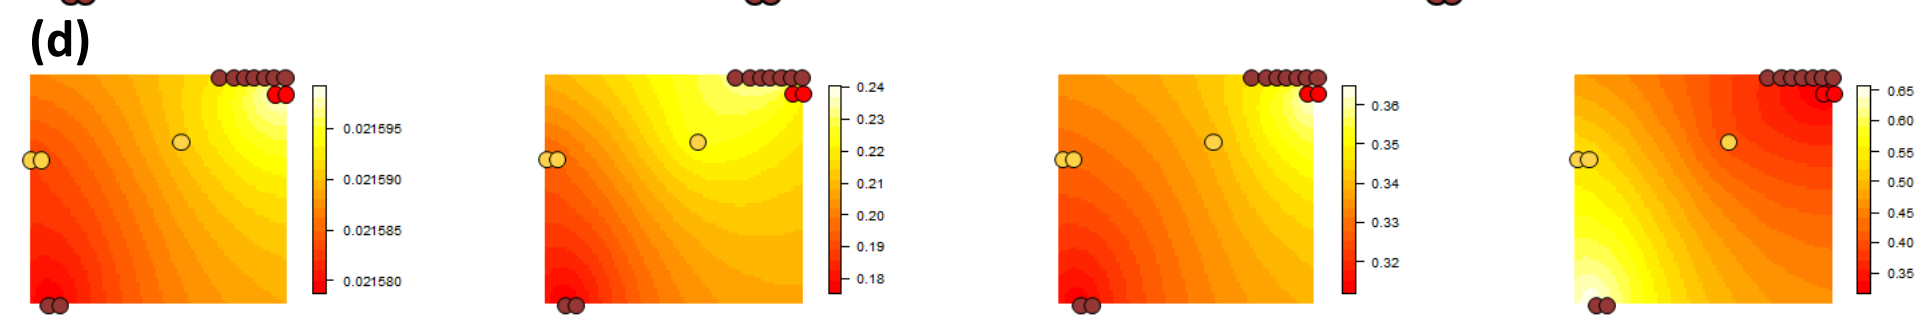

Supplement: 1471-2148-13-64-S3.pdf [file 1471-2148-13-64-S3.pdf]
